# Supplementary material
Source: publisher figshare collection journal article supplement (https://acs.figshare.com/ndownloader/files/4026547)
Supplement: Supplementary file 1 [file 4026547]

## Supporting Information

### **Ni-doped graphene/carbon cryogels and their applications as versatile candidates for water purification**

**Gao Wei <sup>†</sup>, Yue-E Miao <sup>†</sup>, Chao Zhang <sup>†</sup>, Zhe Yang <sup>†</sup>, Zhenyan Liu <sup>†</sup>, Weng Weei Tjiu <sup>‡</sup>, Tianxi Liu <sup>†,\*</sup>**

<sup>†</sup> State Key Laboratory of Molecular Engineering of Polymers, Department of Macromolecular Science, Fudan University, Shanghai 200433, P. R. China.

<sup>‡</sup> Institute of Materials Research and Engineering, A\*STAR (Agency for Science, Technology and Research), 3 Research Link, Singapore 117602, Singapore

\* Corresponding author. E-mail: txliu@fudan.edu.cn (T. X. Liu), Tel: +86-21-55664197; Fax: +86-21-65640293.

**Figure S1.** AFM image of graphene oxide monolayer (a), and the corresponding height profile (b).

**Figure S2.** Compressive stress-strain curves of CC, GCC and NGCC.

**Figure S3.** The nitrogen-sorption isotherm and the BJH (Barret-Joyner-Halenda) desorption pore size distribution curve of NGCC. The inset is the cumulative pore volume-pore diameter curve.

**Figure S4.** Adsorption isotherm of NGCC prepared with 6 mg/mL GO concentration.

$q_e$  (mg/g) is the amount of dyes adsorbed at equilibrium, and  $C_e$  (mg/mL) is the equilibrium solute concentration.

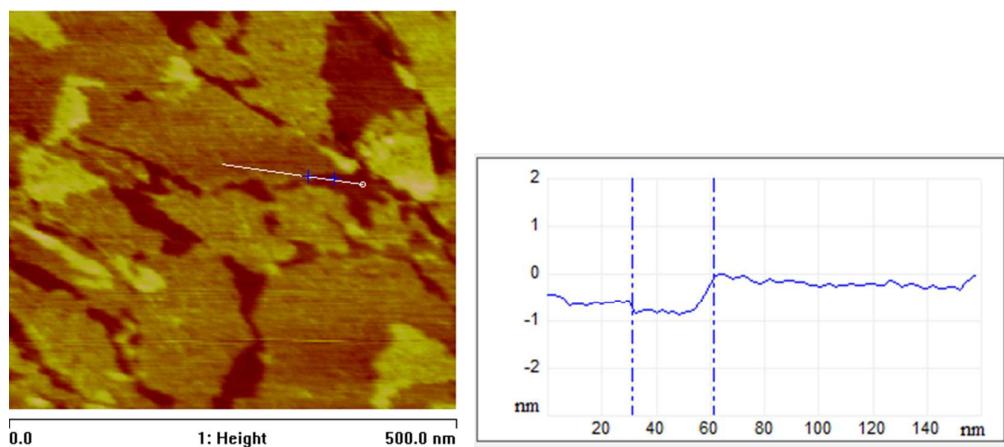

**Figure S1**

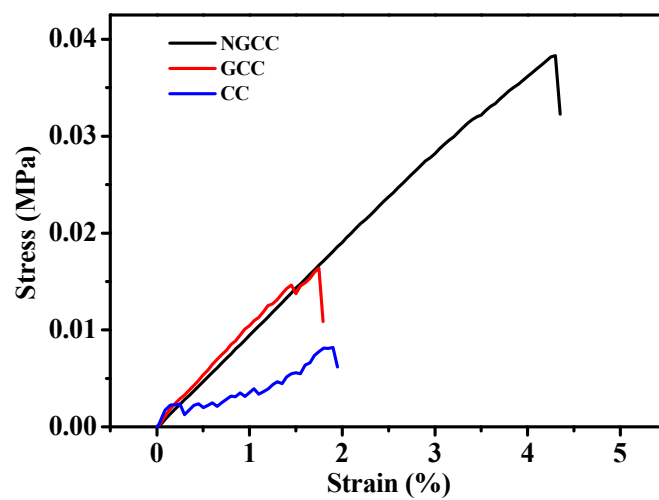

**Figure S2**

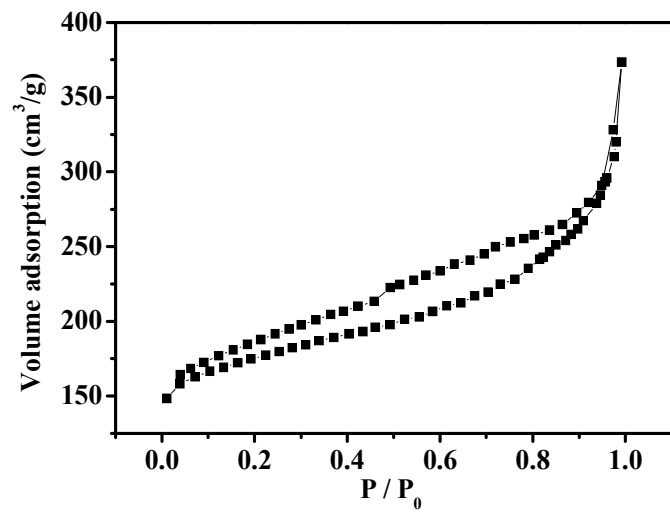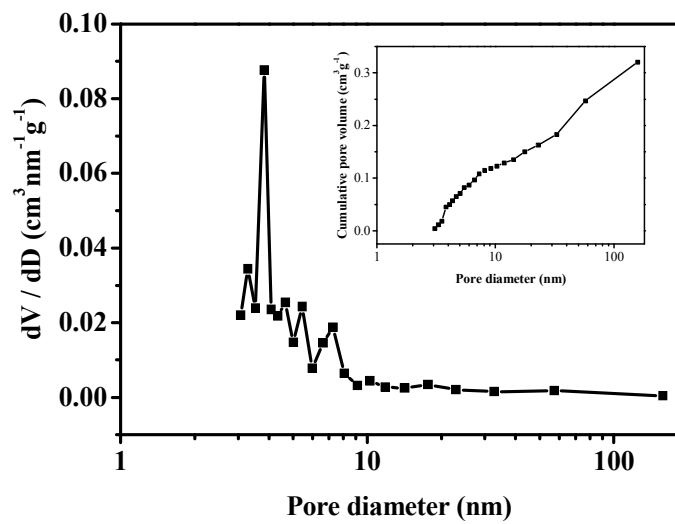

Figure S3

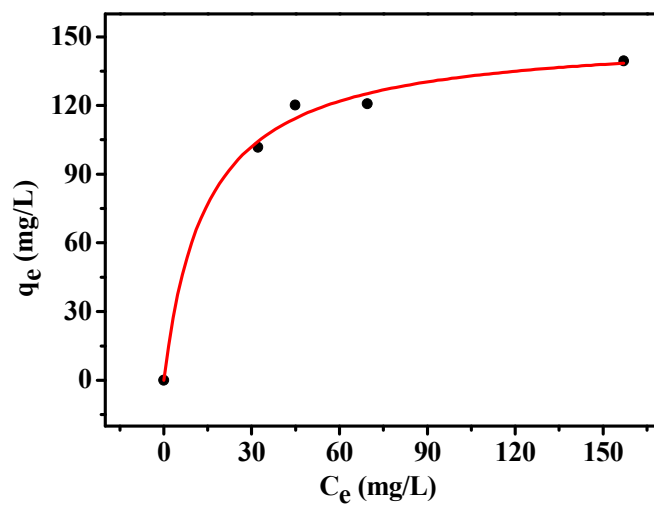

**Figure S4**

**Table S1.** Langmuir isotherm parameters for MB adsorption of NGCC

| Adsorbent         | $q_{\max}$ (mg g <sup>-1</sup> ) | $b$ (L mg <sup>-1</sup> ) | $R^2$ |
|-------------------|----------------------------------|---------------------------|-------|
| NGCC (6 mg/mL GO) | 151                              | 0.069                     | 0.993 |
